1 **Variations in neonatal age segments mortality in Kenya's**  
2 **malaria epidemiological zones by community uptake of**  
3 **iron-supplements and anti-malaria drugs during**  
4 **pregnancy: Analysis based on 2014 Kenya demographic**  
5 **and health survey**

6

7

8 Neonatal age segments mortality, and iron-supplements and anti-  
9 malaria drugs uptake during pregnancy

10 Boniface O. K'Oyugi<sup>1\*</sup>

11 Population Studies and Research Institute, University of Nairobi, Nairobi, Kenya

12 \* Corresponding author

13 E-mail: [bkoyugi@uonbi.ac.ke](mailto:bkoyugi@uonbi.ac.ke)

14

15 Manuscript dated: August 2018

16

## 17 **Abstract**

### 18 **Introduction**

19 Although past studies have established that iron-supplements and anti-malaria drugs taken by  
20 mothers during pregnancy reduce the risk of neonatal deaths in high prone malaria areas,  
21 little is known about their impact on mortality risks in neonatal age segments in Kenya. The  
22 study objective was to analyse variations in neonatal age segments mortality rates by uptake  
23 of these two antenatal care services and determine their effects on the age segments mortality  
24 in Kenya's malaria zones.

### 25 **Data and methods**

26 This study used data from the 2014 Kenya Demographic and Health Survey (KDHS).  
27 Survival status information for 20,794 children born less than 60 months prior to interview  
28 date and reported mothers' uptake of iron-supplements and anti-malaria drugs during last  
29 pregnancy was analysed. Life table method was used to estimate mortality rates and Poisson  
30 multivariate regression models were fitted to determine relative risks of death for the study  
31 variables.

### 32 **Results**

33 The results show that variations in neonatal age segments mortality in Kenya's malaria zones  
34 are statistically insignificant. The contributions of early neonatal (0 to 7 days) to neonatal  
35 mortality rate are 80% and 100% in low and high malaria zones, respectively. Combined high  
36 community uptake of iron-supplements and anti-malaria drugs during pregnancy reduce  
37 significantly mortality risk in late neonatal (8 days to less than one month) in all malaria  
38 zones when effects of other risk factors are controlled for.

## 39 Conclusions

40 The findings suggest that future decline in neonatal mortality in all Kenya's malaria zones  
41 depend mainly on reduction of early neonatal mortality. High community uptake of iron-  
42 supplements and anti-malaria drugs during pregnancy has significant reduction effect on late  
43 neonatal mortality in all malaria zones. This study recommends improvement of future  
44 KDHS data quality, especially on care for small and sick neonates.

45

---

## 46 Introduction

47 Neonatal death is defined, according to the World Health Organization (WHO), as  
48 death within 28 days of birth of any live-born baby regardless of weight or gestation age [1].  
49 Globally, about 2.6 million children died in the first month of life in 2016 with 1 million  
50 (38%) dying in the first day and another 1 million (38%) dying within the next six days [2].  
51 Although the global neonatal mortality rate fell from 37 deaths per 1,000 live births in 1990  
52 to 19 in 2016, this 49% decline was slower than the 62% mortality decline among 1-59  
53 months old children [3]. In comparison to other regions of the world during the same period,  
54 sub-Saharan Africa had the slowest neonatal mortality decline of 40% but with impressive  
55 mortality decline of 63% among the 1-59 months old children [3]. Kenya's neonatal mortality  
56 declined from 33 per live births 1,000 in 2003 to 22 in 2017 with 71% dying in the first week  
57 of life [4]. In similarity with sub-Saharan Africa region's pattern, Kenya's 33% reduction of  
58 neonatal mortality was slower than 63% mortality reduction among the 1-59 months old  
59 children during the period 2003 to 2014 [4-5].

60

61           About three quarters of the global neonatal deaths in 2016 were attributed to causes  
62 that are readily preventable and treatable with cost-effective interventions covering the  
63 antenatal period, time around birth and first week of life and care for small and sick neonates  
64 [3,6-8]. Attainment of their universal coverage (99%) would avert 70% of neonatal deaths  
65 with antenatal period interventions contributing about one third [3,6-8]. In 2016, the three  
66 main causes of neonatal deaths with contributions estimated at 35%, 24% and 15%  
67 respectively were: preterm birth complications (prematurity and low birth weight); intra-  
68 partum related conditions (birth asphyxia and birth trauma); and, sepsis (neonatal infections)  
69 [3,6-8]. In early neonatal period (0-6 days), preterm birth complications and intra-partum  
70 related conditions were the main causes of death (40% and 29% respectively) while sepsis  
71 and preterm were most dominant (44% and 21% respectively) in the later neonatal period (7-  
72 28 days) [3,7-8]. Sub-Saharan Africa region has the highest preterm birth complications [3,7-  
73 8].

74  
75           Although antenatal period interventions have the least impact on neonatal deaths  
76 compared to the other two broad categories of interventions, they provide opportunity for  
77 integrated service delivery for pregnant women [9-12]. Antenatal period interventions  
78 enhance prevention, detection, and treatment of conditions or diseases associated with high  
79 risk of neonatal death during pregnancy, delivery, and care of new-born [9-12]. In  
80 developing countries, antenatal period interventions include provision of iron-supplements  
81 during pregnancy for early neonatal mortality reduction by reducing risk of preterm and birth  
82 asphyxia [10-15]. Iron deficiency is the most common cause of anaemia in pregnancy and  
83 iron-supplements are recommended for prevention [10,12]. About 20% of early neonatal  
84 deaths in Indonesia could be attributed to lack of iron-supplements during pregnancy [14,16].

85 Kenya's 2014 uptake of iron-supplements during pregnancy was 69% with wide regional  
86 variations ranging from 40% in North Eastern province to 83% in Nyanza province [4].

87

88         Appropriate intermittent preventive treatment of malaria during pregnancy is also one  
89 of the antenatal period interventions associated with neonatal mortality reduction especially  
90 in high malaria endemic regions [14,16]. Malaria is a risk factor for maternal anaemia during  
91 pregnancy which is associated with increased risk of low birth weight and preterm delivery  
92 [17-19]. Intermittent preventive treatment of malaria in pregnancy reduces antenatal  
93 parasitaemia and placental malaria and its uptake is associated with 29% reduction in low  
94 birth and 31% reduction in neonatal mortality [10]. The adverse effects of malaria on risk of  
95 neonatal death are amplified when pregnant women are iron deficient [19]. Malaria  
96 transmission rate in new-born is estimated to be up to 20% in sub-Saharan Africa region [20].  
97 Combined iron-supplements and malaria prophylaxis during pregnancy reduced significantly  
98 neonatal mortality in 19 malaria-endemic countries in sub-Saharan Africa [14,16].

99

100         More than 70% of Kenya's population is at risk of malaria morbidity with pregnant  
101 women and children under age 5 years being the most vulnerable to infection [21]. Kenya has  
102 four malaria epidemiological zones: endemic covering the Lake Victoria in western Kenya  
103 and coastal region; highland covering western highlands of Kenya; semi and seasonal  
104 covering northern and south-eastern regions of Kenya; and, low risk covering central  
105 highlands of Kenya and Nairobi [22]. Neonatal mortality rates in Kenya vary by  
106 administrative region but do not depict clear patterns based on malaria epidemiological zones  
107 [3]. Uptake of intermittent preventive treatment of malaria in Kenya's malaria endemic zones  
108 during pregnancy is 38% (based on WHO recommended standard of three or more doses)

109 with wide variations by malaria transmission intensity ranging from 43% in coast endemic to  
110 15% in highland epidemic [21-22].

111

112 Since most of the neonatal deaths occurring globally and in sub-Saharan Africa  
113 countries are attributable to causes which are readily preventable and treatable with known  
114 health care interventions, studies on impact of neonatal period interventions on neonatal  
115 deaths adjusted for other known mortality risk factors during: time around birth and first  
116 week of life; and, care especially for small and sick neonates [13-16,23-24]. These studies  
117 used mainly the Mosley and Chen's 1984 conceptual framework for determinants of child  
118 survival in developing countries to identify mortality risk factors whose effects needed to be  
119 adjusted for [24-30]. The Mosley and Chen's framework groups mortality risk factors into  
120 two broad groups: socio-demographic and birth characteristics; and, antenatal, delivery and  
121 post-delivery care services [31].

122

123 Among the numerous socio-demographic neonatal mortality risk factors commonly  
124 used as controls in studies undertaken in sub-Saharan Africa and south Asia regions, less than  
125 ten had significant effects and they included: first born infants; short birth intervals of less  
126 than 2 years; maternal age at delivery of the child of less than 20 or 30 plus years; male  
127 infants; perceived smaller than average sized infants; multiple births; high HIV/AIDS  
128 prevalence; and, rural residence [14,16,24,29-30]. The antenatal, delivery and post-delivery  
129 neonatal mortality risk factors found to have significant effects in south Asia and sub-Saharan  
130 Africa regions included: caesarean mode of delivery; and, delayed breastfeeding initiation  
131 period of beyond 24 hours [26-30]. Some of the neonatal mortality risk factors used as  
132 controls and found not to have significant effects, in this second broad group, included: non-

133 facility delivery; non-skilled delivery attendance; and, inappropriate immunization and  
134 treatment of sick infants [26-30].

135

136 Estimates of neonatal mortality rates and effects of iron- supplements and intermittent  
137 prevention and treatment of malaria in pregnancy on neonatal mortality have been reported in  
138 recent studies undertaken in south Asia and sub-Saharan Africa regions [14,16,24,32-35].  
139 However, most of these studies treated neonatal period as a single age block and ignored the  
140 non-uniform shape of age pattern of mortality during neonatal period. In Kenya, provision of  
141 iron-supplements and anti-malaria drugs during pregnancy are part of the Antenatal Care  
142 (ANC) services package. The main objective of this study was to analyse variations in  
143 neonatal age segments mortality rates in Kenya's high and low prone malaria areas by uptake  
144 of these two ANC services at community level. The secondary objective was to determine  
145 the effects of community uptake of these ANC services on neonatal age segments mortality  
146 risks in Kenya's high and low prone malaria areas. Deeper understanding of neonatal age  
147 segments mortality risk reductions associated with uptake of these ANC services in Kenya  
148 would contribute to improvements in neonatal survival programmes.

149

## 150 **Data and methods**

### 151 **Data**

152 This study used data from the 2014 KDHS which was made available for public use  
153 including research during the official launch of its final report in December 2015 by the  
154 Kenya National Bureau of Statistics (KNBS). The 2014 KDHS dataset was also distributed to  
155 key stakeholder institutions and special interest groups. It can also be accessed, with official  
156 request, from KNBS and The DHS Program, ICF International. The 2014 KDHS is a

157 nationally representative household survey data collected using the fifth National Sample  
158 Survey and Evaluation (NASSEP V) master frame which is operated and maintained by  
159 KNBS. The 2014 KDHS dataset consists of five separate recode data files namely:  
160 household; woman; male; couple; and, child. This study used the child data file which  
161 contains information on individual children born to women during the period 0 to 59 months  
162 before the interview. Appended to individual child's record is information associated with the  
163 child gathered using household, woman's and man's questionnaires. This analysis was based  
164 on a total of 20,794 children born less than 60 months prior to interview date and these  
165 excluded interview month births.

166

## 167 Ethical statement and data availability

168 The 2014 KDHS was approved by the Scientific and Ethical Review Committee of  
169 Kenya Medical Research Institute (KEMRI). Individual survey respondents agreed to  
170 participate voluntarily. Consent note was read to all respondents and signed by interviewers.  
171 The 2014 KDHS data released to researchers by KNBS and used in this analysis is without  
172 access to any personal data. The data can be accessed, upon official request, from KNBS  
173 (email: [info@knbs.or.ke](mailto:info@knbs.or.ke) website: [www.knbs.or.ke](http://www.knbs.or.ke)) and The DHS Program, ICF International  
174 (email: [info@DHSprogram.com](mailto:info@DHSprogram.com) website: [www.DHSprogram.com](http://www.DHSprogram.com)).

175

## 176 Definitions and measurements

### 177 Outcome event

178 The outcome event in this analysis was the occurrence of death during neonatal period  
179 which was segmented into three age segments to capture the age pattern of neonatal



180 mortality. The three age segments were: less than 1 day; 1 to 7 days; and, 8 days to less than  
181 one month. Two variables were used to measure neonatal age segment mortality. Life table  
182 probability of dying from birth to end of age segment per 1,000 live births was used to  
183 measure mortality rate. This measure facilitated analysis of mortality variations in malaria  
184 zones in Kenya by the study ANC services. Risk of death in age segment was used as  
185 dependent variable in the multivariate regression models fitted to determine effects of the  
186 study variables on neonatal age segment mortality.

187

188 Computation of life table probability and risk of death in neonatal age segment  
189 requires information on deaths and exposure days. The following information in the child  
190 data file were extracted: age at death in days for a neonatal death; age at death in completed  
191 months for a child who died after neonatal period; and, age in completed months for a child  
192 who was alive on interview date. A child who was alive on interview date, with age in  
193 completed months recorded as zero, was assumed to have lived for 15 days. A child reported  
194 to have died on the day of birth was assumed to have contributed a half exposure day in the  
195 first age segment. Total number of deaths in a neonatal age segment was obtained by  
196 summing all deaths in the age segment. Total exposure days in a neonatal age segment was  
197 the sum of total exposure days contributed by children who died in the age segment and total  
198 exposure days contributed by children who lived beyond the age segment. A child who lived  
199 beyond the age segment contributed full exposure days in the age segment.

200

## 201 Study antenatal care services

202 The ANC services of interest to this study were uptake of iron-supplements and anti-  
203 malarial drugs during pregnancy. Proportions of children in 2014 KDHS sample clusters  
204 whose mothers took each of these two ANC services were applied in this analysis as their

205 community uptake estimates. Unfortunately, antenatal care information for woman's uptake  
206 of iron-supplements and anti-malaria drugs was only captured for last pregnancy in 2014  
207 KDHS. This resulted into a large proportion of children in this analysis with missing  
208 information on their maternal uptake of these services during pregnancy (66% for iron-  
209 supplements and 29% for anti-malarial drugs). Children with missing information were  
210 mainly cases of non-last-born children and also last-born children who had died prior to  
211 interview date. Weighted proportions of survey sample clusters' uptake values for each study  
212 ANC service were computed to resolve the problem of sample variability at cluster level. The  
213 distribution of weighted clusters' uptake proportions for each study ANC service was  
214 arranged in ascending order and a 40:60 percentile criterion used to group obtained weighted  
215 proportion into low (if 40th percentile or less) and high (if 60th percentile or more).

216

## 217 Malaria epidemiological zones

218 The 2014 KDHS sample clusters identification numbers were used to categorise them  
219 into malaria zones. Both the 2014 KDHS and 2015 Kenya Malaria Indicator Survey (KMIS)  
220 were conducted using the NASSEP V master sampling frame. Appendix A of the 2015 KMIS  
221 Report contains distribution of malaria epidemiological zones and sample allocation clusters  
222 by the 47 counties in Kenya [22]. In this analysis, the four Kenya's malaria epidemiological  
223 zones were further grouped into high prone malaria areas (comprising of endemic and  
224 highland) and low prone malaria areas (comprising of semi, seasonal and low risk).

225

## 226 Confounding neonatal mortality risk factors

227 This study used the 1984 Mosley and Chen's conceptual framework for analysis of  
228 determinants of child survival in developing countries to identify potential neonatal period  
229 mortality risk factors that needed to be controlled for. This framework classifies the risk

230 factors into two groups: socio-demographic and birth characteristics; and, antenatal, delivery  
231 and post-delivery care services. During the preliminary stages in this analysis, only  
232 significant neonatal mortality risk factors derived from literature review with a bias on recent  
233 studies in south Asia and sub-Saharan Africa regions were considered for inclusion. In the  
234 final stages in this analysis, only those found to be significant at 95% confidence level and  
235 above, in bivariate regression analysis for neonatal age segment mortality determinants, were  
236 included as control variables. Brief descriptions and categorisations of control variables used  
237 in each neonatal age segment mortality analysis are provided below.

238

239 In age segment period day of birth, the following three socio-demographic and birth  
240 characteristics factors were used as confounding mortality risk variables: HIV positive  
241 pregnant women per 10,000 population (low if  $< 14.4$  and high if  $\geq 14.4$ ); maternal age at  
242 child's birth in years (low risk if 18-34 and high risk if  $< 18$  and 35+); and, birth type (low  
243 risk if single and high risk if multiple). Only one mortality risk factor associated with  
244 antenatal, delivery and post-delivery care services was used as control variable and this was  
245 proportion in community with early breastfeeding initiation period of less than 24 hours (low  
246 if  $< 62.5\%$  and high if  $\geq 62.5\%$ ).

247

248 In age segment period 1 to 7 days, five socio-demographic and birth characteristics  
249 factors were used as confounding mortality risk variables namely: HIV positive pregnant  
250 women per 10,000 population (categories same as in the first age segment); preceding birth  
251 interval length in months (short if  $< 12$  and long if first birth or 12+); birth type (categories  
252 same as in first age segment); elevated birth order (high if birth order =1 or 4+ and maternal  
253 age at child's birth  $< 18$  or 35+ years; and, low if birth order is 2-3 and maternal age at  
254 child's birth is 18-34 years); and, maternal education (high risk if none or primary; and low

255 risk if sec+). In this age segment two mortality risk factors associated with antenatal, delivery  
256 and post- delivery care services were used as control variables. These were: proportion in  
257 community with required tetanus injections during pregnancy (low if  $< 55.6\%$  and high if  $\geq$   
258  $55.6\%$ ); and, mode of delivery (not caesarean section and caesarean section).

259

260 In age segment period 8 days to less than 1 month, only one socio-demographic and  
261 birth characteristics factor was used as control variable and this was HIV positive pregnant  
262 women per 10,000 population (categories same as in the first two age segments). Two  
263 mortality risk factors associated with antenatal, delivery and post- delivery care services were  
264 used as control variables in this age segment. These were: birth type (categories same as in  
265 first two age segments); and, proportion of children sick with diarrhoea in community who  
266 received appropriate treatment/care (low if  $< 55.6\%$  and high if  $\geq 55.6\%$ ).

267

268 The 2014 KDHS data file doesn't contain information needed to compute survey  
269 clusters' values of HIV positive pregnant women per 10,000 population. Administrative  
270 county level values were therefore used in this study and were computed using information  
271 contained in following two published reports available for public use: 2014 Kenya HIV  
272 County Profiles (KHCP); and, Kenya Population Projections (KPP) [36-37]. The 2014 KHCP  
273 Report contains numbers of HIV positive pregnant women in the year 2013 for each of the 47  
274 administrative counties in Kenya. The 2010 KPP Report contains 2013 population projections  
275 for each of the 47 counties. Fortunately, the NASSEP V frame, which was used in the 2014  
276 KDHS, had survey clusters covering all the 47 counties. The individual child information in  
277 the child data file was linked to the computed county level HIV positive pregnant women per  
278 10,000 population using survey county codes. In this analysis, the computed county level  
279 estimate was used as the measure of this control variable.

280

## 281 Methods

282 This study applied life table and multivariate Poisson regression methods. Life table  
283 method was used to calculate probabilities of dying from birth to age  $x$  in days per 1,000 live  
284 births ( ${}_0q_x$ ). The computed  ${}_0q_1$ ,  ${}_0q_7$  and  ${}_0q_{30}$  are probabilities of dying by ages 1 day, 7 days  
285 and 1 month, respectively per 1,000 live births. These probabilities were computed for each  
286 malaria prone area by study ANC service. Detailed technical expositions of life table method  
287 are available in the book published by International Union for the Scientific Study of  
288 Population (IUSSP) [38]. The Statistical Package for Social Sciences (SPSS) was used to  
289 compute total deaths and total exposure days in neonatal period age segment in malaria prone  
290 area by study ANC service. 95% Confidence Intervals (CI) for the probability values were  
291 also computed using the package.

292

293 Multivariate Poisson regression models were fitted to estimate effects of the study  
294 ANC services on neonatal age segment mortality in each Kenya's malaria prone area when  
295 controlling for effects of potential confounding mortality risk factors. In this analysis, the  
296 inclusion criterion was age segment mortality risk factor found to be significant at 95%  
297 confidence level and above in bivariate regression analysis. Poisson regression was chosen  
298 due to its ability to generate odds ratios estimates for covariates and also deal with any  
299 violation of the underlying assumption on equal mean and variance in distribution of rare  
300 events including neonatal deaths [39]. Equation 1 presents the general mathematical form of  
301 Poisson multivariate regression model which was used in this study to undertake bivariate  
302 and multivariate regressions analysis.

303

304 
$$\ln(Y) - \ln(T) = \alpha + \beta_i X_i \dots\dots\dots(1)$$

305 Where:-

306 Y is neonatal age segment total death counts

307 T is neonatal age segment total exposure days

308  $\alpha$  is intercept term

309  $X_i$  is a vector of regression variables

310  $\beta_i$  is a vector of regression coefficients

311

312 The dependent variable was specified as the natural logarithm of total number of  
313 deaths in age segment. The off-set variable was specified as the natural logarithm of total  
314 days of exposures in age segment. The vector of regression variables were the specified  
315 explanatory variables. The Generalized Linear Models (GLIM) subroutine in SPSS computer  
316 software package was used to fit bivariate and multivariate regression models. It provided  
317 parameter estimates for covariate odds ratios in the regression equations. Since odds ratio of a  
318 variable reference category is one (1.000), it then follows that ratios greater than 1 indicate  
319 increased likelihood of mortality and those ratios less than 1 indicate reduced likelihood of  
320 mortality relative to the reference category. Only odds ratios with at least 95% statistical  
321 significance level were considered to have significant effects in this analysis.

322

## 323 **Results**

324 Neonatal age segments mortality differentials in Kenya's malaria  
325 prone areas by study ANC services

326 Out of the total 20794 births analysed in this study, there are 440 neonatal deaths  
327 which are distributed as follows: 33% in age segment less than 1 day; 54% in age segment 1

328 to 7 days; and, 13% in age segment 8 days to less than one month. The computed life table  
 329 probabilities of dying (per 1,000 live births) during neonatal age segments are: 7 by first day;  
 330 18 by first week; and, 21 before attaining age one month. Table 1 reports estimated neonatal  
 331 period mortality rates, with 95% CI, for the study ANC services variables in Kenya's malaria  
 332 areas.

333 **Table 1. Neonatal age segments mortality rates for study ANC services variables in**  
 334 **Kenya's malaria areas.**

335

| Community uptake of ANC service during pregnancy | Probability of dying by first day (per 1,000 live births with 95% CI) |                         |           | Probability of dying by first week (per 1,000 live births with 95% CI) |                         |           | Probability of dying before age one month (per 1,000 live births with 95% CI) |                         |           |
|--------------------------------------------------|-----------------------------------------------------------------------|-------------------------|-----------|------------------------------------------------------------------------|-------------------------|-----------|-------------------------------------------------------------------------------|-------------------------|-----------|
|                                                  | Malaria low prone area                                                | Malaria high prone area | All areas | Malaria low prone area                                                 | Malaria high prone area | All areas | Malaria low prone area                                                        | Malaria high prone area | All areas |
| Iron-supplements                                 |                                                                       |                         |           |                                                                        |                         |           |                                                                               |                         |           |
| High(≥ 44.4%)                                    | 7 (5,9)                                                               | 7 (6,9)                 | 7 (6,9)   | 20(17,23)                                                              | 16(14,19)               | 18(16,20) | 22(19,26)                                                                     | 19(17,22)               | 21(19,23) |
| Low(<44.4%)                                      | 6 (3,10)                                                              | 8 (5,13)                | 7(5,10)   | 19(14,25)                                                              | 22(16,30)               | 20(16,25) | 23(17,30)                                                                     | 24(18,32)               | 23(19,28) |
| Anti-malaria drugs                               |                                                                       |                         |           |                                                                        |                         |           |                                                                               |                         |           |
| High (≥ 40%)                                     | 7 (5,9)                                                               | 8 (6,10)                | 8 (6,9)   | 21(17,25)                                                              | 17(15,21)               | 19(16,21) | 23(19,28)                                                                     | 20(17,23)               | 21(18,24) |
| Low (<40%)                                       | 6 (4,9)                                                               | 6 (4,9)                 | 6 (5,8)   | 18(15,22)                                                              | 17(13,22)               | 18(15,21) | 22(18,26)                                                                     | 21(16,27)               | 22(19,26) |
| Combination of iron-supplements and anti-malaria |                                                                       |                         |           |                                                                        |                         |           |                                                                               |                         |           |
| High iron-supplements and high anti-malaria      | 7 (5,10)                                                              | 8 (6,10)                | 7 (6,9)   | 21(17,26)                                                              | 17(14,21)               | 18(16,21) | 22(18,27)                                                                     | 20(17,23)               | 21(18,24) |
| High iron-supplements and low anti-malaria       | 7 (4,10)                                                              | 6 (3,10)                | 6 (5,9)   | 18(14,24)                                                              | 14(10,20)               | 17(14,20) | 22(18,28)                                                                     | 18(13,25)               | 21(17,25) |
| Low iron-supplements and high anti-malaria       | 7 (3,19)                                                              | 9 (5,18)                | 9(5,15)   | 20(11,36)                                                              | 20 (-,-)                | 20(14,28) | 25(15,43)                                                                     | 20(13,31)               | 22(16,31) |
| Low iron-supplements and low anti-malaria        | 5 (3,10)                                                              | 6 (2,14)                | 5 (3,9)   | 19(13,26)                                                              | 25(16,38)               | 21(16,27) | 22(16,30)                                                                     | 28(19,42)               | 24(19,30) |
| Average                                          | 6 (5,8)                                                               | 7 (6,9)                 | 7 (6,8)   | 19(17,22)                                                              | 17(15,20)               | 18(17,20) | 22(20,25)                                                                     | 20(18,23)               | 21(19,23) |

336

Notes:

337

1. Malaria prone area (High consists of endemic and highland zones; and, Low consists of semi, seasonal and low risk zones).

338

2. Missing value denoted with a dash.

339

340

341 The 95% confidence intervals for the mortality estimates indicate that there are no  
342 significant variations in age segment mortality rates for high and low malaria prone areas in  
343 Kenya. However, during the first day of life, high malaria prone areas have slightly higher  
344 mortality rates compared to low prone areas. On community uptake of iron-supplements  
345 during pregnancy, the results show that there are no significant variations in neonatal period  
346 age segments mortality rates in malaria areas. However, low community uptake of iron-  
347 supplements has higher mortality rates in all neonatal period age segments in high malaria  
348 prone areas relative to low malaria areas.

349

350 The results also show that there are no significant variations in neonatal period age  
351 segments mortality by community uptake of anti-malaria drugs during pregnancy in Kenya's  
352 malaria areas. However, low community uptake of anti-malaria drugs has slightly higher  
353 mortality rates before attainment of age one month in high malaria prone areas (21 per 1,000  
354 live births) compared with low malaria areas (20 per 1,000 live births).

355

356 Analysis results for various combinations of community uptake of iron-supplements and  
357 anti-malaria drugs during pregnancy show that there are no significant variations in neonatal  
358 period age segments mortality by combination of the uptake in Kenya's malaria areas.  
359 However, the combination of low iron-supplements and low anti-malaria drugs compared to  
360 that of high iron-supplement and high anti-malaria drugs has much higher mortality rates  
361 during later two neonatal period age segments (first week and less than one month) in high  
362 malaria prone areas relative to their counterparts in low malaria areas. The combination of  
363 low iron-supplements and low anti-malaria drugs has probabilities of dying per 1,000 live  
364 births by ages one week and less than one month estimated at 25 and 28, respectively. The



365 comparable mortality rates for combination of high iron-supplements and high anti-malaria  
366 drugs are 17 and 20, respectively.

367

## 368 Effects of the study ANC services on risk of death during day of birth

369 Table 2 presents odds ratios with 95% CI and p-values for community uptake of iron-  
370 supplements and anti-malaria drugs during pregnancy variables on risk of death during the  
371 day of birth in Kenya's malaria areas. The odds ratios were obtained from fitted three  
372 multivariate Poisson regression models (Model 1 for low malaria prone, Model 2 for high  
373 malaria prone and Model 3 for all areas). The table also provides odds ratios and p-values for  
374 interactive/combo variables involving uptake of the two study ANC services in Models  
375 1 and 2. In addition, Table 2 presents odds ratios and p-values for three socio-demographic  
376 and birth characteristics variables (HIV positive pregnant women per 10,000 population;  
377 maternal age at child's birth in years; and, birth type) and one variable associated with  
378 antenatal, delivery and post- delivery care services (proportion in community with early  
379 breastfeeding initiation period of less than 24 hours) that were used as adjustment variables in  
380 the three regression models fitted. Malaria prone area was only used as adjustment variable in  
381 Model 3.

382

383

384

385

386

387

388

389

390

391

392 **Table 2. Odds ratios for mortality during day of birth for study ANC services and**  
393 **adjustment variables in Kenya's malaria areas.**

| Variable                                                           | Model 1<br>(Malaria low prone area) |          | Model 2<br>(Malaria high prone area) |          | Model 3 (All areas)  |          |
|--------------------------------------------------------------------|-------------------------------------|----------|--------------------------------------|----------|----------------------|----------|
|                                                                    | Odds ratio ( 95% CI)                | p-value  | Odds ratio ( 95% CI)                 | p-value  | Odds ratio ( 95% CI) | p-value  |
| Community uptake of ANC service during pregnancy                   |                                     |          |                                      |          |                      |          |
| Iron-supplements                                                   |                                     |          |                                      |          |                      |          |
| High (≥ 44.4%)                                                     | 0.639 (0.278-1.469)                 | 0.292    | 1.072 (0.379-3.034)                  | 0.896    | 0.934 (0.501- 1.742) | 0.830    |
| Low (<44.4%)                                                       | 1.000                               |          | 1.000                                |          | 1.000                |          |
| Anti-malaria drugs                                                 |                                     |          |                                      |          |                      |          |
| High (≥ 40%)                                                       | 1.962 (0.594-6.477)                 | 0.269    | 1.504 (0.437-5.182)                  | 0.518    | 1.842 (0.837-4.057)  | 0.129    |
| Low (<40%)                                                         | 1.000                               |          | 1.000                                |          | 1.000                |          |
| Combination of iron-supplements and anti-malaria                   |                                     |          |                                      |          |                      |          |
| High iron-supplements and high anti-malaria                        | 0.567 (0.144-2.235)                 | 0.417    | 0.523 (0.144-1.907)                  | 0.327    | 0.463 (0.196-1.093)  | 0.079*   |
| High iron-supplements and low anti-malaria                         | 1.000                               |          | 1.000                                |          | 1.000                |          |
| Low iron-supplements and high anti-malaria                         | 1.000                               |          | 1.000                                |          | 1.000                |          |
| Low iron-supplements and low anti-malaria                          | 1.000                               |          | 1.000                                |          | 1.000                |          |
| Adjustment variables                                               |                                     |          |                                      |          |                      |          |
| Maternal age at child's birth (in years)                           |                                     |          |                                      |          |                      |          |
| 18-34                                                              | 0.446 (0.247-0.804)                 | 0.007**  | 0.574 (0.337-0.977)                  | 0.041**  | 0.519 (0.356-0.757)  | 0.001**  |
| <18 and 35+                                                        | 1.000                               |          | 1.000                                |          | 1.000                |          |
| Birth type                                                         |                                     |          |                                      |          |                      |          |
| Single                                                             | 0.040 (0.018-0.085)                 | 0.000*** | 0.200 (0.095-0.421)                  | 0.000*** | 0.110 (0.066-0.186)  | 0.000*** |
| Multiple                                                           | 1.000                               |          | 1.000                                |          | 1.000                |          |
| Breastfeeding initiation in community (proportion with < 24 hours) |                                     |          |                                      |          |                      |          |
| High (≥62.5%)                                                      | 0.175 (0.072-0.423)                 | 0.000*** | 0.189 (0.073-0.488)                  | 0.001**  | 0.190 (0.102-0.354)  | 0.000*** |
| Low (<62.5%)                                                       | 1.000                               |          | 1.000                                |          | 1.000                |          |
| HIV positive pregnant women (per 10,000 population)                |                                     |          |                                      |          |                      |          |
| Low (<14.4)                                                        | 0.592 (0.328-1.089)                 | 0.082*   | 0.596 (0.285-1.245)                  | 0.169    | 0.629 (0.420-0.941)  | 0.024**  |
| High (≥14.4)                                                       | 1.000                               |          | 1.000                                |          | 1.000                |          |
| Malaria area                                                       |                                     |          |                                      |          |                      |          |
| Low prone                                                          |                                     |          |                                      |          | 1.187 (0.819-1.719)  | 0.365    |
| High prone                                                         |                                     |          |                                      |          | 1.000                |          |

| Model parameters          |                      |       |                     |       |                    |       |
|---------------------------|----------------------|-------|---------------------|-------|--------------------|-------|
| Intercept term            | 3.416 (0.676-17.266) | 0.137 | 0.441 (0.059-2.867) | 0.370 | 0.752(0.244-2.318) | 0.620 |
| Likelihood ratio $\chi^2$ | 61.264               |       | 25.477              |       | 77.015             |       |
| Degrees of freedom        | 7                    |       | 7                   |       | 8                  |       |
| p-value                   | 0.000***             |       | 0.000***            |       | 0.000***           |       |

394  
395  
396  
397  
398  
399

Notes:

1. Malaria prone area (High consists of endemic and highland zones; and, Low consists of semi, seasonal and low risk zones)
2. \*\*\*p < 0.001, \*\*p < 0.05 and \* p < 0.1

400 The results show that only combined high iron-supplements and high anti-malaria drugs  
401 community uptake during pregnancy has significant reduction effect on risk of neonatal death  
402 in the first day of life but at 90% significant level. The results also show that all the four  
403 mortality risk factors which were adjusted for in the fitted regression models are significant  
404 mortality risk factors during the day of birth in both low and high malaria areas in Kenya.

404

405 Effects of the study ANC services on risk of death during the period 1  
406 to 7 days

407 Table 3 provides odds ratios with 95% CI and p-values for community uptake of iron-  
408 supplements and anti-malaria drugs during pregnancy variables on risk of child death during  
409 the period 1 to 7 days in Kenya's malaria areas. The strategy used to undertake regression  
410 analysis for the first neonatal age segment (day of birth) was replicated in this second age  
411 segment. However, the only difference was on the adjustment variables used. Five socio-  
412 demographic and birth characteristics variables (HIV positive pregnant women per 10,000  
413 population; preceding birth interval length in months; birth type; elevated birth order risk;  
414 and, maternal education) were used as adjustment variables in the three regression models  
415 fitted. Two variables associated with antenatal, delivery and post-delivery care services  
416 (proportion in community with required tetanus injections during pregnancy; and, mode of  
417 delivery) were also included as control variables in the three regression models.

418 **Table 3. Odds ratios for mortality during the period 1 to 7 days for study ANC services**  
 419 **and adjustment variables in Kenya's malaria areas.**

| Variable                                         | Model 1<br>(Malaria low prone area) |          | Model 2<br>(Malaria high prone area) |          | Model 3 (All areas) |          |
|--------------------------------------------------|-------------------------------------|----------|--------------------------------------|----------|---------------------|----------|
|                                                  | Odds ratio (95% CI)                 | p-value  | Odds ratio (95% CI)                  | p-value  | Odds ratio (95% CI) | p-value  |
| Community uptake of ANC service during pregnancy |                                     |          |                                      |          |                     |          |
| Iron-supplements                                 |                                     |          |                                      |          |                     |          |
| High ( $\geq 44.4\%$ )                           | 0.730 (0.424-1.257)                 | 0.256    | 0.445 (0.216-0.919)                  | 0.028**  | 0.587 (0.384-0.898) | 0.014**  |
| Low ( $<44.4\%$ )                                | 1.000                               |          | 1.000                                |          | 1.000               |          |
| Anti-malaria drugs                               |                                     |          |                                      |          |                     |          |
| High ( $\geq 40\%$ )                             | 1.848 (0.772-4.426)                 | 0.168    | 0.669 (0.248-1.801)                  | 0.426    | 1.360 (0.723-2.558) | 0.340    |
| Low ( $<40\%$ )                                  | 1.000                               |          | 1.000                                |          | 1.000               |          |
| Combination of iron-supplements and anti-malaria |                                     |          |                                      |          |                     |          |
| High iron-supplements and high anti-malaria      | 0.585 (0.223-1.537)                 | 0.277    | 0.865 (0.298-2.514)                  | 0.790    | 0.680(0.342-1.353)  | 0.272    |
| High iron-supplements and low anti-malaria       | 1.000                               |          | 1.000                                |          | 1.000               |          |
| Low iron-supplements and high anti-malaria       | 1.000                               |          | 1.000                                |          | 1.000               |          |
| Low iron-supplements and low anti-malaria        | 1.000                               |          | 1.000                                |          | 1.000               |          |
| Adjustment variables                             |                                     |          |                                      |          |                     |          |
| Mode of delivery                                 |                                     |          |                                      |          |                     |          |
| Not caesarean section                            | 0.290 (0.156-0.540)                 | 0.000*** | 0.213 (0.084-0.536)                  | 0.001**  | 0.304 (0.186-0.497) | 0.000*** |
| Caesarean section                                | 1.000                               |          | 1.000                                |          | 1.000               |          |
| Preceding birth interval length (in months)      |                                     |          |                                      |          |                     |          |
| 12+                                              | 0.044 (0.018-0.113)                 | 0.000*** | 0.065 (0.020-0.211)                  | 0.000*** | 0.053 (0.026-0.111) | 0.000*** |
| <12                                              | 1.000                               |          | 1.000                                |          | 1.000               |          |
| Elevated birth order risk                        |                                     |          |                                      |          |                     |          |
| Low (2-3 & mother age 18-34)                     | 1.098 (0.744-1.621)                 | 0.636    | 1.112 (0.719-1.720)                  | 0.633    | 1.105 (0.827-1.476) | 0.499    |
| High (1,4+ & mother age <18,35+)                 | 1.000                               |          | 1.000                                |          | 1.000               |          |
| Birth type                                       |                                     |          |                                      |          |                     |          |
| Single                                           | 0.115 (0.059-0.223)                 | 0.000*** | 0.060 (0.035-0.102)                  | 0.000*** | 0.079 (0.053-0.117) | 0.000*** |
| Multiple                                         | 1.000                               |          | 1.000                                |          | 1.000               |          |
| Mother's education level                         |                                     |          |                                      |          |                     |          |
| Secondary and above                              | 0.991 (0.581-1.691)                 | 0.975    | 1.135 (0.678-1.898)                  | 0.630    | 1.122 (0.779-1.617) | 0.537    |
| None/primary                                     | 1.000                               |          | 1.000                                |          | 1.000               |          |

|                                                                                     |                     |       |                     |        |                     |       |
|-------------------------------------------------------------------------------------|---------------------|-------|---------------------|--------|---------------------|-------|
| Child tetanus protection (community uptake of required injections during pregnancy) |                     |       |                     |        |                     |       |
| High ( $\geq 55.6\%$ )                                                              | 1.020 (0.681-1.527) | 0.925 | 1.170 (0.743-1.843) | 0.497  | 1.063 (0.787-1.436) | 0.688 |
| Low ( $< 55.6\%$ )                                                                  | 1.000               |       | 1.000               |        | 1.000               |       |
| HIV positive pregnant women (per 10,000 population)                                 |                     |       |                     |        |                     |       |
| Low ( $< 14.4$ )                                                                    | 0.808 (0.532-1.227) | 0.317 | 0.789 (0.483-1.344) | 0.384  | 0.943 (0.690-1.290) | 0.716 |
| High ( $\geq 14.4$ )                                                                | 1.000               |       | 1.000               |        | 1.000               |       |
| Malaria area                                                                        |                     |       |                     |        |                     |       |
| Low prone                                                                           |                     |       |                     |        | 1.218 (0.908-1.634) | 0.188 |
| High prone                                                                          |                     |       |                     |        | 1.000               |       |
| Model parameters                                                                    |                     |       |                     |        |                     |       |
| Intercept term                                                                      | 1.785 (.476-6.696)  | 0.390 | 4.663 (.789-27.560) | 0.089* | 1.767(0.629-4.964)  | 0.280 |
| Log Likelihood $\chi^2$                                                             | 78.824              |       | 103.163             |        | 172.502             |       |
| Degrees of freedom                                                                  | 10                  |       | 10                  |        | 11                  |       |
| p-value                                                                             | 0.000***            |       | 0.000***            |        | 0.000***            |       |

Notes:

1. Malaria prone area (High consists of endemic and highland zones; and, Low consists of semi, seasonal and low risk zones)
2. \*\*\*p < 0.001, \*\*p < 0.05 and \* p < 0.1

The results show that high community uptake of iron-supplements during pregnancy has significant reduction effect on risk of child death during the neonatal period 1 to 7 days in Model 3 (for combined low and high malaria prone areas). The results also indicate that only two socio-demographic and birth characteristics variables (preceding birth interval length in months; and, birth type) and only one variable associated with antenatal, delivery and post-delivery care services (mode of delivery) are significant control variables in all the three fitted regression models.

## Effects of the study ANC services on risk of death during the period 8 days to less than a month

Table 4 presents odds ratios with 95% CI and p-values for community uptake of iron-supplements and anti-malaria drugs during pregnancy variables on risk of child death during the period 8 days to less than a month in Kenya's malaria prone areas. The regression

438 analysis strategy applied in this third neonatal age segment was similar to the one used in the  
 439 first two age segments. However, two socio-demographic and birth characteristics variables  
 440 (HIV positive pregnant women per 10,000 population; and, birth type) were used as  
 441 adjustment variables in the three regression models fitted. In addition, one variable associated  
 442 with antenatal, delivery and post- delivery care services (proportion of children sick with  
 443 diarrhoea in community who received appropriate care) was included as a control variable in  
 444 the three regression models fitted.

445  
 446  
 447  
 448  
 449  
 450  
 451  
 452  
 453  
 454  
 455  
 456  
 457  
 458  
 459

460 **Table 4. Odds ratios for mortality during the period 8 days to less than a month for**  
 461 **study ANC services and adjustment variables in Kenya’s malaria areas.**

| Variable                                         | Model 1<br>(Malaria low prone area) |         | Model 2<br>(Malaria high prone area) |         | Model 3 (All areas)  |         |
|--------------------------------------------------|-------------------------------------|---------|--------------------------------------|---------|----------------------|---------|
|                                                  | Odds ratio (95% CI)                 | p-value | Odds ratio (95% CI)                  | p-value | Odds ratio (95% CI)  | p-value |
| Community uptake of ANC service during pregnancy |                                     |         |                                      |         |                      |         |
| Iron-supplements                                 |                                     |         |                                      |         |                      |         |
| High (≥44.4%)                                    | 1.530 (0.438-5.351)                 | 0.506   | 0.632 (0.153-2.615)                  | 0.527   | 1.069 (0.430-2.657)  | 0.886   |
| Low (<44.4%)                                     | 1.000                               |         | 1.000                                |         | 1.000                |         |
| Anti-malaria drugs                               |                                     |         |                                      |         |                      |         |
| High (≥ 40%)                                     | 3.367 (0.512-22.146)                | 0.207   | 0.625 (0.222-1.757)                  | 0.373   | 2.307 (0.525-10.138) | 0.269   |
| Low (<40%)                                       | 1.000                               |         | 1.000                                |         | 1.000                |         |
| Combination of iron-supplements and anti-malaria |                                     |         |                                      |         |                      |         |
| High iron-supplements and high anti-             | 0.132 (0.018-0.991)                 | 0.049** | 1.000                                |         | 0.172 (0.035-0.835)  | 0.029** |

|                                                                           |                     |          |                     |          |                     |          |
|---------------------------------------------------------------------------|---------------------|----------|---------------------|----------|---------------------|----------|
| malaria                                                                   |                     |          |                     |          |                     |          |
| High iron-supplements and low anti-malaria                                | 1.000               |          | 1.000               |          | 1.000               |          |
| Low iron-supplements and high anti-malaria                                | 1.000               |          | 1.000               |          | 1.000               |          |
| Low iron-supplements and low anti-malaria                                 | 1.000               |          | 1.000               |          | 1.000               |          |
| Adjustment variables                                                      |                     |          |                     |          |                     |          |
| Birth type                                                                |                     |          |                     |          |                     |          |
| Single                                                                    | 0.016 (0.004-0.070) | 0.000*** | 0.176 (0.022-1.432) | 0.104    | 0.049 (0.018-0.139) | 0.000*** |
| Multiple                                                                  | 1.000               |          | 1.000               |          | 1.000               |          |
| Child diarrhoea treatment (% sick in community received appropriate care) |                     |          |                     |          |                     |          |
| High( $\geq 55.6$ )                                                       | 1.107 (0.381-3.221) | 0.851    | 0.808 (0.343-1.906) | 0.627    | 0.961 (0.504-1.830) | 0.903    |
| Low (<55.6)                                                               | 1.000               |          | 1.000               |          | 1.000               |          |
| HIV positive pregnant women (per 10,000 population)                       |                     |          |                     |          |                     |          |
| Low(<14.4)                                                                | 0.696 (0.196-2.478) | 0.576    | 1.108 (0.417-2.941) | 0.837    | 0.808 (0.361-1.808) | 0.604    |
| High( $\geq 14.4$ )                                                       | 1.000               |          | 1.000               |          | 1.000               |          |
| Malaria area                                                              |                     |          |                     |          |                     |          |
| Low prone                                                                 |                     |          |                     |          | 0.914 (0.461-1.814) | 0.797    |
| High prone                                                                |                     |          |                     |          | 1.000               |          |
| Model parameters                                                          |                     |          |                     |          |                     |          |
| Intercept term                                                            | 1.009 (0.001-0.054) | 0.000*** | 0.002(.000-0.026)   | 0.000*** | 0.005(0.001-0.020)  | 0.000*** |
| Log Likelihood $\chi^2$                                                   | 32.500              |          | 3.954               |          | 28.357              |          |
| Degrees of freedom                                                        | 6                   |          | 5                   |          | 7                   |          |
| p-value                                                                   | 0.000***            |          | 0.556               |          | 0.000***            |          |

Notes:

1. Malaria prone area (High consists of endemic and highland zones; and, Low consists of semi, seasonal and low risk zones)
2. \*\*\*p < 0.001, \*\*p < 0.05 and \* p < 0.1

462  
463  
464  
465  
466  
467 The results show that the combination of community uptake of high iron-supplements  
468 with high iron-supplements during pregnancy has significant reduction effect on risk of death  
469 during the period 8 days to less than a month in Model 1 (malaria low prone area) and Model  
470 3 (all areas). The results also indicate that only one socio-demographic and birth  
471 characteristics control variable (birth type) is significant in Models 1 and 3. In addition, the

472 only one control variable associated with antenatal, delivery and post- delivery care services  
473 (proportion of children sick with diarrhoea in community who received appropriate care),  
474 included in this age segment analysis, is not significant.

475

## 476 **Discussion**

477 This study investigates variations in mortality in three neonatal period age segments  
478 in epidemiological malaria areas in Kenya by community uptake of two ANC services during  
479 pregnancy with the aim of determining the effects of uptake of these services on age segment  
480 mortality. The results depict insignificant variations in age segment mortality rates by the two  
481 study ANC services, but a mixed picture of the beneficial effects of these services on  
482 mortality risks in the neonatal age segments.

483

484 The study results on age pattern of mortality during neonatal period in Kenya are  
485 consistent with the global, south Asia and sub-Saharan Africa regions patterns [2,8,30]. The  
486 analysis show that in both high and low malaria prone areas, the force of mortality is greatest  
487 in the second age segment (1 to 7 days) followed by the first segment (day of birth) and  
488 lowest in the last age segment (8 days to less than one month). Based on the mortality rates  
489 obtained, the contribution of early neonatal mortality (0 to 7 days) to Kenya's neonatal  
490 mortality rate is about 75%. Its contribution to neonatal mortality rates in low malaria prone  
491 areas and high malaria areas are 80% and 100%, respectively.

492

493 Although the results on mortality rates variations in neonatal age segments are  
494 statistically insignificant, the depicted patterns are consistent with the study expectations.  
495 Low uptake of the study ANC services treated separately and in combination is associated



496 with higher mortality rates in all age segments in high malaria prone areas in Kenya. The  
497 finding that uptake of high iron-supplements and high anti-malaria drugs during pregnancy  
498 reduces significantly mortality risks in the third age segment (8 days to less than one month)  
499 relative to low iron-supplements and low anti-malaria uptake is generally consistent with  
500 earlier findings for south Asia and sub-Saharan Africa regions [14,16,24].

501

502 The unexpected finding, although statistically insignificant, is that high community  
503 uptake of anti-malaria drugs during pregnancy is associated with high neonatal period age  
504 segments mortality. This stands in contrast to previous studies, especially with the south Asia  
505 study, which indicated that intermittent preventive treatment of malaria in pregnancy is  
506 associated with about 31% reduction in neonatal mortality [10]. A possible explanation is that  
507 in Kenya, high malaria areas are also high childhood mortality areas and use of anti-malaria  
508 drugs for prevention and treatment in the general population is common. In addition,  
509 provision of anti-malaria drugs during pregnancy is not restricted to ANC services but can be  
510 obtained readily without qualified health personnel's prescription in non-health service  
511 outlets including local shops/kiosks. The reported uptake of anti-malaria drugs during  
512 pregnancy in 2014 KDHS may have captured uptake of anti-malaria drugs by mothers  
513 beyond pregnancy durations.

514

515 This study also identifies and provides effects of the mortality risk factors which were  
516 controlled for in analysing death risks in neonatal age segments in Kenya's malaria areas.  
517 The findings show that the number of significant factors associated with broad group of  
518 socio-demographic and birth characteristics as well as those associated with antenatal,  
519 delivery and post-delivery care services, declined after early neonatal (0 to 7 days). This  
520 suggests that in Kenya, further reduction in mortality risk in late neonatal (8 days to less than

521 one month) may possibly depend largely on care for small and sick neonates. This possibility  
522 is not tested in this analysis but is deduced from the WHO model which attributes neonatal  
523 deaths to readily preventable and treatable causes with cost-effective interventions covering  
524 the antenatal period, time around birth and first week of life and care for small and sick  
525 neonates [2,7,8].

526

527 Due to poor quality of data collected in 2014 KDHS on care for small and sick  
528 neonates, their effects on late neonatal mortality could not be examined in this study. The  
529 2014 KDHS gathered information on immunization, health and nutrition status of all under  
530 five year old children born to women who were interviewed [3]. In this study, measurements  
531 for variables on care and sick neonates were assumed not to differ substantially from those  
532 for the under five year old children. Only one variable on reported care given to sick children  
533 with diarrhoea qualified for inclusion as control in the final fitted regression models. The  
534 other three variables (care given to child with fever/cough, child faecal disposal and timely  
535 postnatal care for non-facility delivery births), which were initially considered for inclusion  
536 in this study, were found to be insignificant at bivariate analysis stage.

537

## 538 **Limitations**

539 This study has limitations which may have affected the accuracy of the computed  
540 neonatal age segments mortality. First, is the missing information on age in completed days  
541 for all neonates found alive on interview date and whose individual age in days were assumed  
542 to be 15 in this analysis. Second, is the missing information on maternal uptake of the study  
543 ANC services for any child in the dataset who was not a last-born or reported dead on  
544 interview date. This necessitated use of weighted cluster level proportions. Third, this study is

545 based on cross-sectional data. Cross-sectional data are subject to omissions and misreporting  
546 of information. This analysis used information on individual children born to women during  
547 the period 0 to 59 months before the interview, excluding interview month. This meant that  
548 some of the reported dates of events, especially on uptake of study ANC services during last  
549 pregnancy, could have been misplaced taking into consideration the possible maximum 59  
550 months duration prior to interview date.

551

## 552 **Conclusions**

553 This study establishes that variations in neonatal age segments mortality rates by  
554 study ANC services in malaria epidemiological areas in Kenya, using cross-sectional 2014  
555 KDHS data, are not statistically significant. It shows that early neonatal contributes about  
556 80% and above of neonatal mortality in all Kenya's malaria zones. The analysis provides  
557 effects of iron-supplements and anti-malaria drugs uptake during pregnancy as well as other  
558 mortality risk factors used as control variables on neonatal age segments mortality. The study  
559 also establishes that combination of high uptake of iron-supplements and high anti-malaria  
560 drugs during pregnancy compared to combination of low iron-supplements and low anti-  
561 malaria uptake, reduce significantly risk of death in late neonatal period of 8 days to less than  
562 one month in low and all malaria areas in Kenya. The study findings have implications for  
563 neonatal survival programmes implementation and future KDHS data collection in Kenya.  
564 Efforts to attain near universal uptake (99%) for the study ANC services should be intensified  
565 given that their 2014 cut-off points for high community uptake during pregnancy are both  
566 below 50% (44% for iron-supplements and 40% for anti-malaria drugs). This study  
567 recommends that efforts be made to improve quality of data on care for small and sick  
568 neonates collected in future DHS type cross-sectional surveys in Kenya.

569

## 570 **Acknowledgements**

571           The author would like to thank the Kenya National Bureau of Statistics (KNBS) for  
572 availing the 2014 KDHS data and the sampled districts codes which facilitated computation  
573 of community variables and categorization of the districts into malaria areas based on the  
574 2015 Kenya MALARIA Indicator Survey Report Appendix A. Comments and suggestions  
575 from reviewers of this manuscript are also acknowledged in advance.

576

## 577 **References**

- 578 1. World Health Organization (WHO). Every Newborn: An action plan to end preventable  
579 deaths. Geneva: WHO; June 2014. ISBN 978 92 4 1507448. Available from:  
580 <http://www.everynewborn.org/Documents/Executive-summary%20EN.pdf>
- 581 2. United Nations Children's Fund (UNICEF). Every Child Alive: The urgent need to end  
582 newborn deaths. UNICEF; 2018. Available from: [http://data.unicef.org/wp-](http://data.unicef.org/wp-content/uploads/2018/02/Every-Child-Alive-report_Final-1.pdf)  
583 [content/uploads/2018/02/Every-Child-Alive-report\\_Final-1.pdf](http://data.unicef.org/wp-content/uploads/2018/02/Every-Child-Alive-report_Final-1.pdf)
- 584 3. United Nations Children's Fund (UNICEF), World Health Organization (WHO), World  
585 Bank Group (WBG), United Nations Population Division (UN). Levels and trends in  
586 child mortality: Report 2017. Estimates developed by the UN inter-agency group for  
587 child estimation (UIGME). UNICEF; 2017. Available from:  
588 [http://www.everywomaneverychild.org/wp-](http://www.everywomaneverychild.org/wp-content/uploads/2017/10/child_Mortality_Report_2017_UNICEF-WHO.pdf)  
589 [content/uploads/2017/10/child\\_Mortality\\_Report\\_2017\\_UNICEF-WHO.pdf](http://www.everywomaneverychild.org/wp-content/uploads/2017/10/child_Mortality_Report_2017_UNICEF-WHO.pdf)
- 590 4. Kenya National Bureau of statistics (KNBS) and ICF Macro. Kenya demographic and  
591 health survey 2014. Calverton, Maryland: KNBS and ICF Macro; 2014.

- 592 5. Central Bureau of Statistics (CBS), Ministry of Health (MOH) and ORC Macro. Kenya  
593 demographic and health survey 2003. Calverton, Maryland: CBS, MOH and ORC Macro;  
594 2004.
- 595 6. World Health Organization (WHO). MCEE-WHO methods and data for child causes of  
596 death 2005 -2015. Global Health Estimates Technical Paper WHO/HIS/IER/GHE/2016.1.  
597 Department of Evidence, Information and Research (WHO, Geneva) and Maternal Child  
598 Epidemiology Estimation (MCEE); February 2016.
- 599 7. Carvajal-Aguirre L, Vaz LME, Singh K, Sitrin D, Moran AC, Khan SM et al. Measuring  
600 coverage of essential maternal and newborn care interventions: A finished agenda,  
601 Journal Global Health, 2017; 7(2):020101. [doi:10.7189/jogh.07.020101](https://doi.org/10.7189/jogh.07.020101)
- 602 8. Oza S, Lawn JE, Hogan DR, Mathers C, Cousens SN. Neonatal cause of death estimates  
603 for early and late periods for 194 countries, 2000 – 2013. Bull World Health Organ. 2015,  
604 93(1): 19-28. [doi:10.2471/BLT.14.139790](https://doi.org/10.2471/BLT.14.139790)
- 605 9. Lawn JE, Blencowe H, Ozar S, You D, Lee ACC, Waiswa P et al. Progress, priorities and  
606 potential beyond survival, Lancet 2014, 384: 189-205. [doi:10.1016/s0140-](https://doi.org/10.1016/s0140-6736(14)60496-7)  
607 [6736\(14\)60496-7](https://doi.org/10.1016/s0140-6736(14)60496-7)
- 608 10. Bhutta ZA, Das JK, Bahl R, Lawn JE, Salam RA, Paul VK et al. Can available  
609 interventions end preventable deaths in mothers, newborn babies and stillbirths and at  
610 what cost? Lancet 2014; 384:347-70. [doi:10.1016/s0140-6736\(14\)60792-3](https://doi.org/10.1016/s0140-6736(14)60792-3)
- 611 11. Lawn JE, Cousens S, Zupan J. 4 million neonatal deaths: when? Where? Why? Lancet  
612 2005; 365:891-900. [doi:10.1016/s0140-6736\(05\)71048-5](https://doi.org/10.1016/s0140-6736(05)71048-5)
- 613 12. Chou D, Daelmans B, Jolivet RM, Kinney M. Ending preventable maternal and newborn  
614 mortality and still births, BMJ 2015, 351:h4255. [doi:10.1136/bmj.h4255](https://doi.org/10.1136/bmj.h4255)

- 615 13. Yasmin S, Osrin D, Paul E, Costello A. Neonatal mortality of low-birth infants in  
616 Bangladesh. Bull world Health Organization 2001; 79:608-14.  
617 <http://www.ncbi.nlm.nih.gov/pubmed/11477963>
- 618 14. Titaley CR, Dibley MJ, Roberts CL, Hall J, Agho K. Iron and folic acid supplements and  
619 reduced early neonatal deaths in Indonesia. Bull World Health Organ. 2010; 88:500-508.  
620 [doi:10.2471/BLT.09.065813](https://doi.org/10.2471/BLT.09.065813)
- 621 15. Ngoc N, Merialdi M, Abdel-Aleem H, Carroli G, Purwar M, Zavaleta N et al. Causes of  
622 still births and early neonatal deaths: data from 7993 pregnancies in six developing  
623 countries. Bull World Health Organization 2006, 84(9):699-705.  
624 [doi:10.2471/BLT.05.027300](https://doi.org/10.2471/BLT.05.027300)
- 625 16. Titaley CR, Dibley MJ, Roberts CL, Hall J, Agho K. Combined Iron/folic acid  
626 supplements and malaria prophylaxis reduce neonatal deaths in 19 sub-Saharan African  
627 countries. The American Journal of Clinical Nutrition 2010; 92:235-43.  
628 [doi:10.3945/ajcn.2009.29093](https://doi.org/10.3945/ajcn.2009.29093)
- 629 17. Brabin BJ. An analysis of malaria in pregnancy in Africa. Bull World Health  
630 Organization 1983; 61:1005-16. Available from:  
631 <https://www.ncbi.nlm.nih.gov/pmc/articles/PMC2536/pdf/bullwho00102-0114.pdf>
- 632 18. Menendez C, Bardaji A, Siguague B, Sanz S, Aponte JJ, Mabunda S et al. malaria  
633 prevention with IPT during pregnancy reduces neonatal mortality. PLoS ONE 2010;  
634 5(2):e9438. [doi:10.1371/journal.pone.0009438](https://doi.org/10.1371/journal.pone.0009438)
- 635 19. Levy A, Fraser D, Katz M, Major M, Shiner E. maternal anaemia during pregnancy is an  
636 independent risk factor for low birth weight and preterm delivery. European Journal of  
637 Obstetric Gynaecology Reproductive Biology 2005; 122:182-6.  
638 [doi:10.106/j.erogb.2005.02.015](https://doi.org/10.106/j.erogb.2005.02.015)

- 639 20. Runsewe-Abiodun IT, Ogufowora OB, Fetuga BM. Neonatal malaria in Nigeria – a 2  
640 year review. BMC Pediatrics 2006; 6:19. [doi:10.1186/1471-2431-6-9](https://doi.org/10.1186/1471-2431-6-9)
- 641 21. Ministry of Health (MOH). The Kenya Malaria Strategy 2009–2018 (Revised 2014).  
642 Nairobi, Kenya: Ministry of Public Health and Sanitation; 2014.
- 643 22. National Malaria Control Programme (NMCP), Kenya National Bureau of Statistics  
644 (KNBS) and ICF International. Kenya Malaria Indicator Survey 2015. Nairobi, Kenya,  
645 and Maryland, USA:NMCP; 2015.
- 646 23. Darmstadt GL, Bhutta ZA, Cousens S, Adam T, Walker N, Bernis L. Evidence-based,  
647 cost-effective interventions: how many newborn babies can we save? Lancet 2005;  
648 365:977-988. [doi:10.1016/s0140-6736\(05\)71088-6](https://doi.org/10.1016/s0140-6736(05)71088-6)
- 649 24. Titaley CR, Dibley MJ, Agho K, Roberts CL, Hall J. Determinants of neonatal mortality  
650 in Indonesia. BMC Public Health 2008; 8:232. [doi:10.1186/147-2458-8-232](https://doi.org/10.1186/147-2458-8-232)
- 651 25. Ronmans C, Chowdhury ME, Alam N, Koblinsky M, Arifeen SE. Trends in stillbirths,  
652 early and late neonatal mortality in rural Bangladesh: the role of public health  
653 interventions. Paediatric Perinatal Epidemiology 2008; 22:269-79. [doi:10.1111/j.1365-](https://doi.org/10.1111/j.1365-3016.2008.00939.x)  
654 [3016.2008.2008.00939.x](https://doi.org/10.1111/j.1365-3016.2008.00939.x)
- 655 26. Halim A, Dewez JE, Biswa A, Rahman F, White S, Van den Broek N. When, where, and  
656 why are baby dying? Neonatal death surveillance and reviews in Bangladesh. PLoS One  
657 2016; 11(8):e0159388. [doi:10.1371/journal.pone.0159388](https://doi.org/10.1371/journal.pone.0159388)
- 658 27. Zeng L, Cheng Y, Dang S, Yan H, Dibley MJ, Cheng S et al. Impact of micronutrient  
659 supplementation during pregnancy in birth weight, duration of gestation, and perinatal  
660 mortality in rural western China: double blind cluster randomised control trial. BMJ 2008,  
661 337:a2001. [doi:10.1136/bmj.a2001](https://doi.org/10.1136/bmj.a2001)

- 662 28. Mullany LC, Katz J, Li YM, Khatry SK, LeClerg SC, Darmstadt GL et al. Breastfeeding  
663 pattern, time to initiation, and mortality risk among newborns in southern Nepal. *Journal*  
664 *of Nutrition* 2008; 138:599-603. [doi:10.1093/jn/138.3.599](https://doi.org/10.1093/jn/138.3.599)
- 665 29. Ezeh OK, Agho KE, Didley MJ, Hall J, Page AN. Determinants of neonatal mortality in  
666 Nigeria: Evidence from 2008 demographic and health survey. *BMC Public Health*;  
667 14:521. [doi:10.1186/1471-2458-14-521](https://doi.org/10.1186/1471-2458-14-521)
- 668 30. Yego F, D'Este C, Bayles J, Nyongesa P, Williams JS. A case-control study of risk  
669 factors for foetal and early neonatal deaths in a tertiary hospital in Kenya. *BMC*  
670 *Pregnancy and Childbirth* 2004; 14:389. [doi:10.1186/s12884-014-0389-8](https://doi.org/10.1186/s12884-014-0389-8)
- 671 31. Mosley WH, Chen LC. An analytical framework for the study of child survival in  
672 developing countries. *Population Development Review* 1984; 10(supplement): 25-45.  
673 <http://www.jstor.org/stable/2807954>
- 674 32. Edmond KM, Zandoh C, Quigley MA, Amenga-Etego S, Owusu-Agyei S, Kirkwood BR.  
675 Delayed breastfeeding initiation increases risk of neonatal mortality. *Pediatrics* 2006;  
676 117:e380-e386. [doi:10.1542/peds.2005-1496](https://doi.org/10.1542/peds.2005-1496)
- 677 33. Edmond KM, Kirkwood BR, Amenga-Etego S, Owusu-Agyei S, Hurt LS. Effects of early  
678 infant feeding practices on infection-specific neonatal mortality: and investigation of  
679 causal links with observational data from rural Ghana. *The American journal of Clinical*  
680 *Nutrition* 2007; 86:1126-31. [doi:10.1093/ajcn/86.4.1126](https://doi.org/10.1093/ajcn/86.4.1126)
- 681 34. Garcia CR, Mullany LC, Rahmanthulla L, Katz J, Thulasiraj RD, Sheeladevi S et al.  
682 Breastfeeding initiation time and neonatal mortality risk among newborns in South India.  
683 *Journal of Perinatology* 2011; 31:397-403. [doi:10.1038/jp.2010.138](https://doi.org/10.1038/jp.2010.138)
- 684 35. Smith ER, Hurt L, Chowdhury R, Sinha B, Fawzi W, Edmond KM. Delayed  
685 breastfeeding initiation and infant survival: A systematic review and meta-analysis. *PLoS*  
686 *ONE* 2017; 12(7):e0180722. [doi:10.1711/journal.pone.0180722](https://doi.org/10.1711/journal.pone.0180722)



- 687 36. National Aids Control Council (NACC) and National AIDS and STI Control Programme  
688 (NASCOP). Kenya HIV County Profiles. Ministry of Health, Nairobi, Kenya; 2014.
- 689 37. Kenya National Bureau of Statistics (KNBS). 2009 Kenya Population and Housing  
690 Census; Analytical Report on Projections: Volume XIV. KNBS, Ministry of State for  
691 Planning, National Development and Vision 2030; March 2012.
- 692 38. Moultrie TA, Dorrington RE, Hill AG, Hill K, Timaeus IM, Zaba B. (eds). Tools for  
693 Demographic Estimation. Paris: International Union for the Scientific Study of  
694 Population; 2013. demographicestimation.iussp.org. ISBN 978-0-620-57491-4
- 695 39. Lawless JF. Statistical models and methods of lifetime data. Wiley series in probability  
696 and mathematical statistics. University of Waterloo, USA; 1982. ISBN 0-471-08544-8
